# Supplementary material for: The Ability of Some Polysaccharides to Disaggregate Lysozyme Amyloid Fibrils and Renature the Protein
Source: MDPI journal article supplement (doi:10.3390/pharmaceutics15020624), 2023-02-13
Supplement: s1 [file s1]

# Supplementary Materials: Novel polysaccharide-protein systems as a fundamental base for anti-amyloid pharmaceutical applications

Olga Makshakova, Liliya Bogdanova, Dzhigangir Faizullin, Diliara Khaibrakhmanova, Sufia Ziganshina, Elena Ermakova, Yuriy Zuev and Igor Sedov

CD spectra of native HEWL and soluble fraction of HEWL fibrils

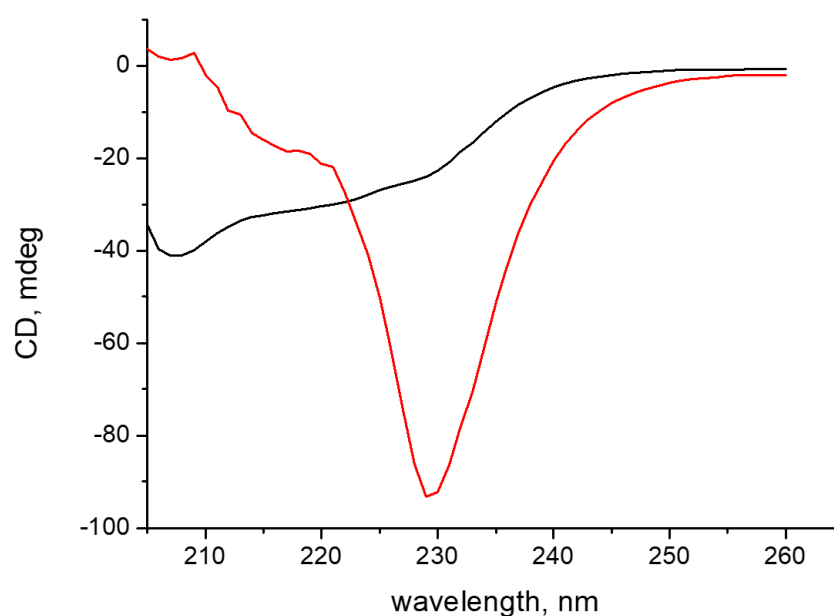

**Figure S1.** CD spectra of native HEWL (black) and soluble fraction of HEWL fibrils (red).

## FTIR spectra of HEWL fibrils initial and upon interactions with polysaccharides

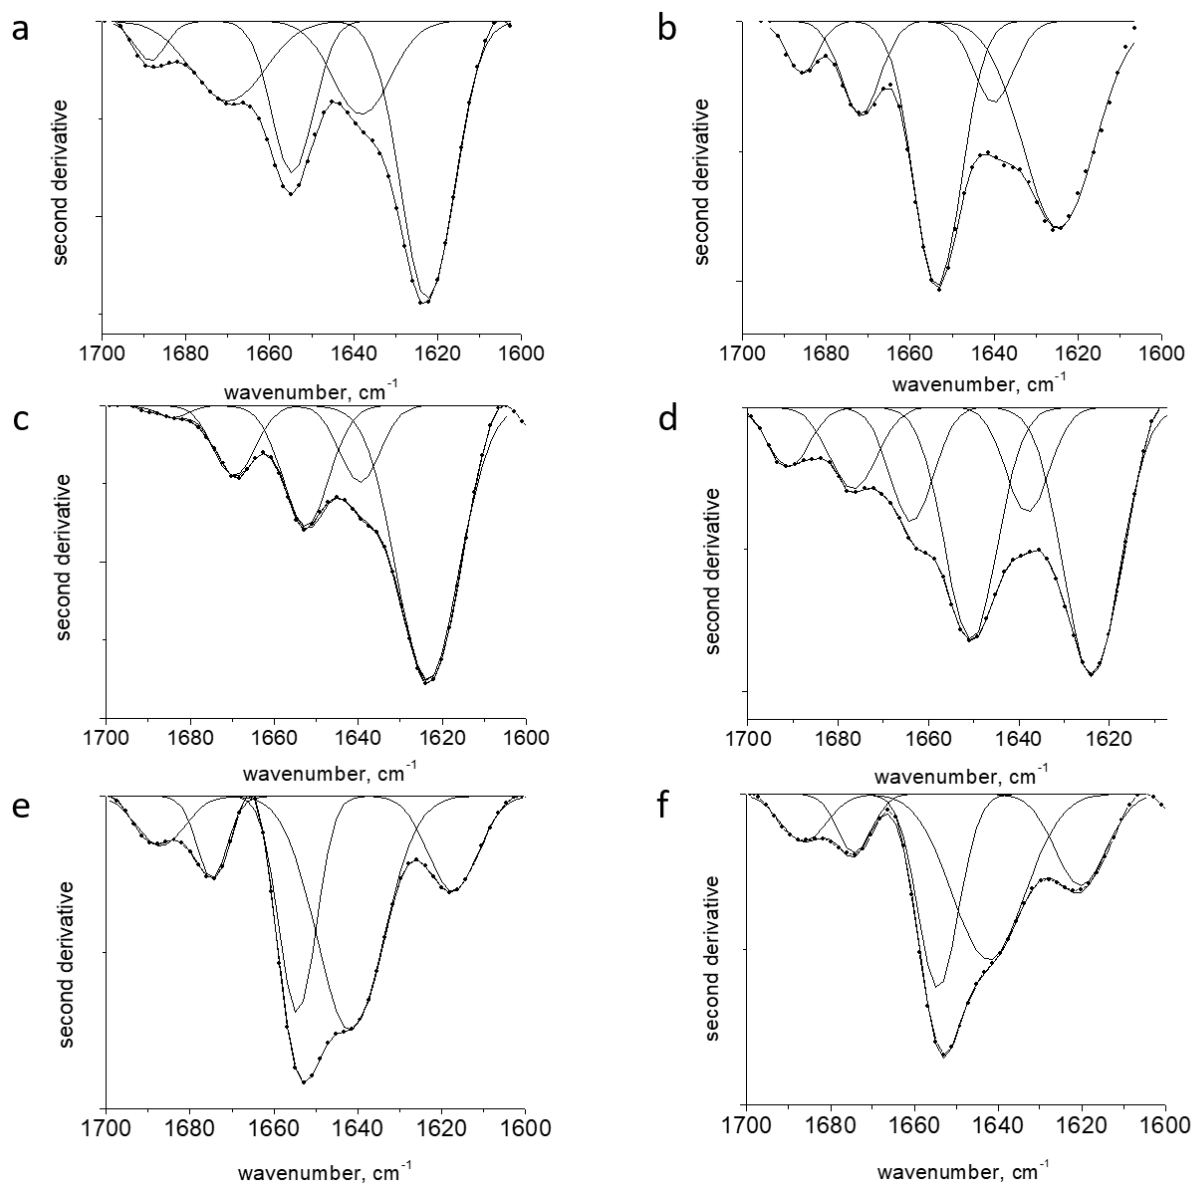

**Figure S2.** Second derivative of FTIR spectra : insoluble fraction of HEWL fibrils (a), soluble fraction of HEWL fibrils (b), soluble fraction of HEWL fibrils mixes with chitosan (c), soluble fraction of HEWL fibrils mixes with galactan (d), soluble fraction of HEWL fibrils mixes with  $\kappa$ -carrageenan (e), soluble fraction of HEWL fibrils mixes with sodium alginate (f).

**Table S1.** Some characteristics of main components of FTIR spectra. .

| Sample | Wavenumber,<br>cm <sup>-1</sup> | Halfwidth,<br>cm <sup>-1</sup> | Peak area, % | Peak attribution                             |
|--------|---------------------------------|--------------------------------|--------------|----------------------------------------------|
| I      | 1622                            | 15                             | 44           | amyloid $\beta$ -structure<br>+ side chains* |
| S      | 1624                            | 20                             | 40           |                                              |
| Ch     | 1623                            | 17                             | 58           |                                              |
| G      | 1623                            | 15                             | 36           |                                              |
| C      | 1617                            | 14                             | 14           |                                              |
| A      | 1620                            | 14                             | 16           |                                              |
| I      | 1654                            | 12                             | 19           | $\alpha$ -helix                              |
| S      | 1653                            | 13                             | 35           |                                              |
| Ch     | 1652                            | 13                             | 19           |                                              |
| G      | 1651                            | 14                             | 28           |                                              |
| C      | 1654                            | 10                             | 24           |                                              |
| A      | 1654                            | 11                             | 27           |                                              |
| I      | 1638                            | 16                             | 16           | intramolecular<br>$\beta$ -structure         |
| S      | 1640                            | 9                              | 9            |                                              |
| Ch     | 1640                            | 10                             | 11           |                                              |
| G      | 1638                            | 10                             | 11           |                                              |
| C      | 1642                            | 18                             | 47           |                                              |
| A      | 1642                            | 20                             | 42           |                                              |

\* the contribution of side chains clearly appearing for C and A was not subtracted from the spectra of I, S, Ch and G. The area of whole band was taken to estimate the content of  $\beta$ -structure. Samples denoted as: I – insoluble fraction of HEWL fibrils, S – soluble fraction of HEWL fibrils, Ch – soluble fraction of HEWL fibrils mixes with chitosan, G – soluble fraction of HEWL fibrils mixes with galactan, C – soluble fraction of HEWL fibrils mixes with  $\kappa$ -carrageenan, A – soluble fraction of HEWL fibrils mixes with sodium alginate.
